# Supplementary material for: Histone Deacetylase Inhibitor (SAHA) Reduces Mortality in an Endotoxemia Mouse Model by Suppressing Glycolysis
Source: MDPI journal article supplement (doi:10.3390/ijms241512448), 2023-08-04
Supplement: s1 [file s1]

## Supplementary Materials

Figure S1

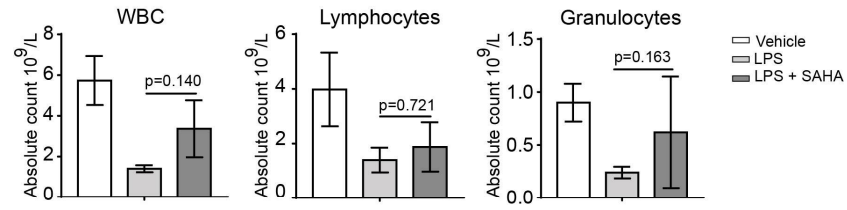

Figure S2

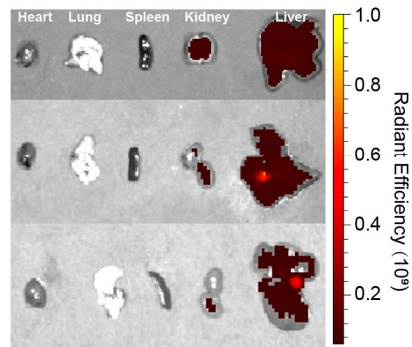

Figure S3

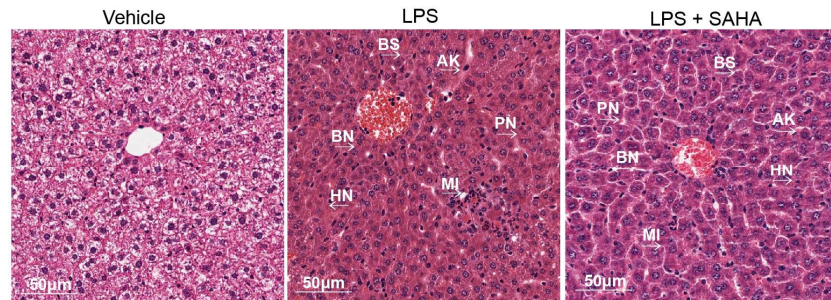

Figure S4

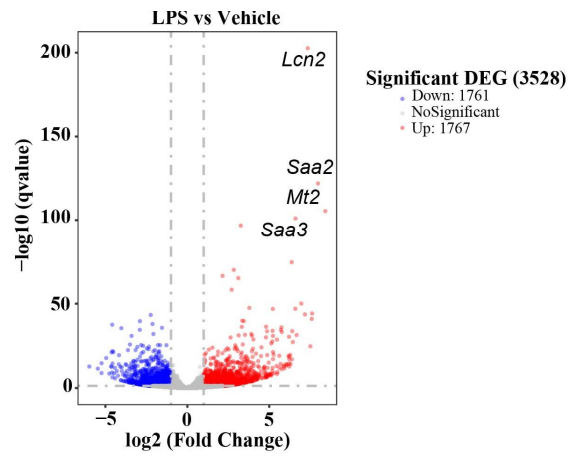

Figure S5

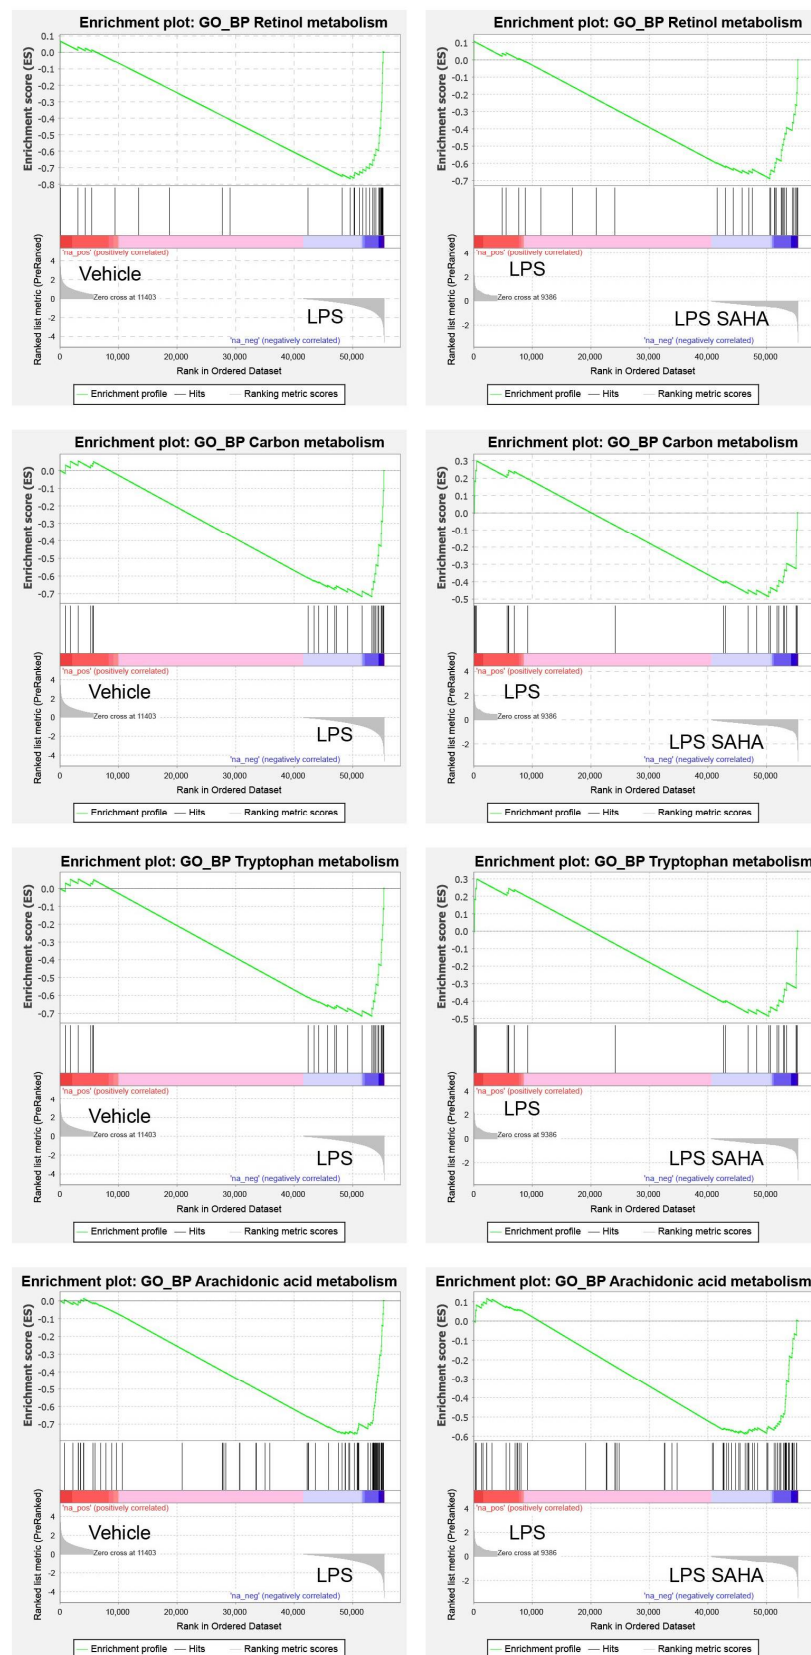

Figure S6

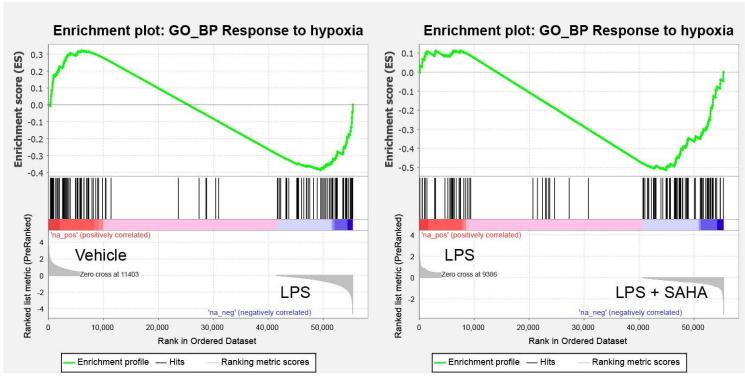

Figure S7

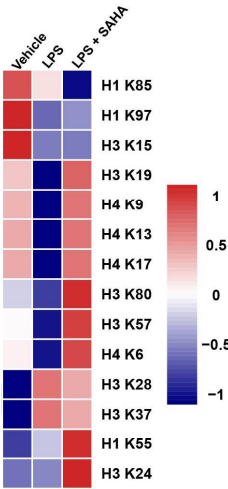

Figure S8

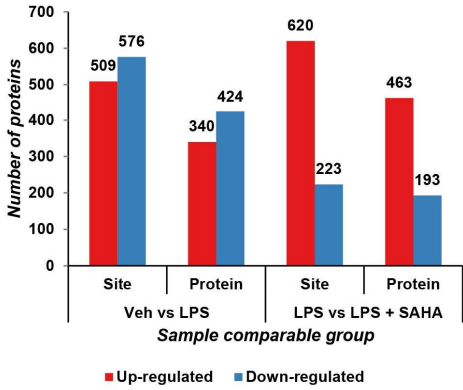

Figure S9

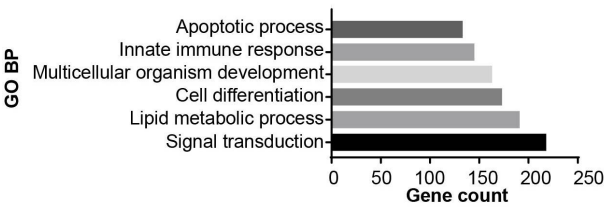

Figure S10

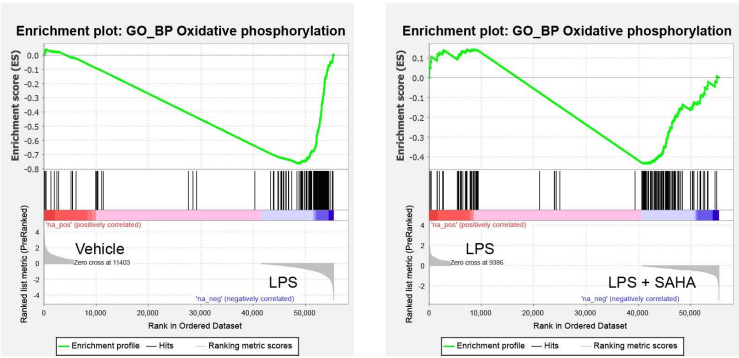

Figure S11

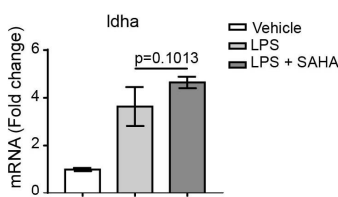

Figure S12

| Sequence   | Species                    |
|------------|----------------------------|
| EEEEARLKSA | <i>Mus musculus</i>        |
| EEEEARLKSA | <i>Rattus norvegicus</i>   |
| EEEEARLKSA | <i>Homo sapiens</i>        |
| EEEEARLKSA | <i>Sus scrofa</i>          |
| EEEEARLKSA | <i>Macaca fascicularis</i> |

Figure S13

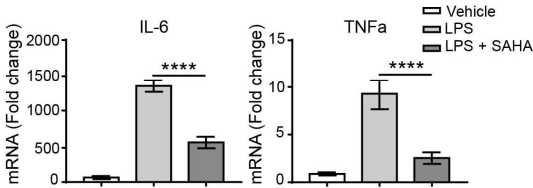

Figure S14

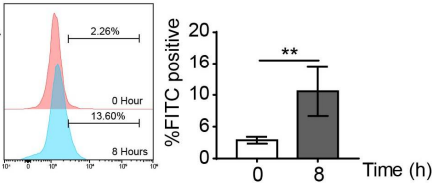

Figure S15

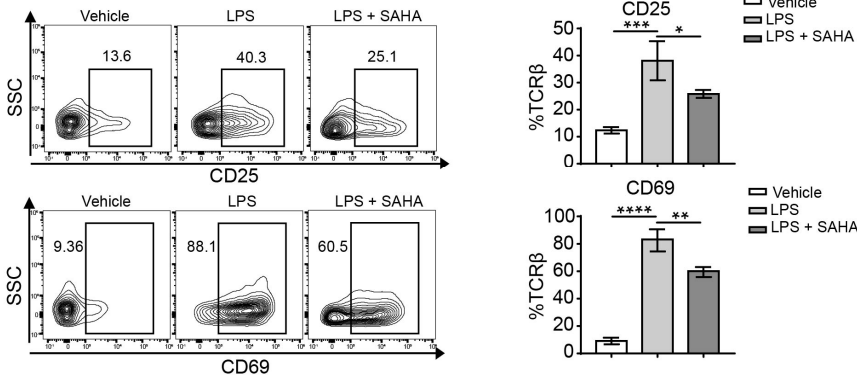

**S1.** Haematology analysis of the absolute count of white blood cells, lymphocytes, granulocytes and monocytes in mouse peripheral blood 8 hours after the treatment in indicated groups (n=5 animals /group) Results in S1 are shown as averages  $\pm$ SD. \*p < 0.05; \*\*p < 0.01; \*\*\*p < 0.001; \*\*\*\*p < 0.0001, by one-way ANOVA.

**S2.** Multiplexed in vivo imaging determine the biodistribution of FITC-conjugated LPS (1 mg/kg i.p.) in indicated organs 8 hours post-injection (n=3 animals /group).

**S3.** Hematoxylin and eosin (HE) staining of liver sections in indicated groups. BS: blood sinusoids; PN: pyknotic nuclei; BN: binucleated hepatocytes; MI: monocytes infiltration; HN: hepatic cell necrosis (n=3 animals /group).

**S4.** The volcano plot shows differentially expressed genes (fold change>1) in LPS (30 mg/kg i.p.) versus the vehicle-treated group.

**S5.** GSEA analysis was applied using the hallmark genes from the MSigDB Database in indicated treatment conditions and pathways (Retinol metabolism; Carbon metabolism; Tryptophan metabolism and Arachidonic acid metabolism).

**S6.** GSEA analysis was applied using the hallmark genes from the MSigDB Database in the biological process of response to hypoxia in indicated treatment conditions.

**S7.** Heatmap showing the acetylation levels of histone acetylation sites in the indicated treatment condition.

**S8.** Bar chart showing the number of significantly changed protein and acetylation sites in indicated treatment conditions.

**S9.** Gene ontology (GO) terms enrichment analysis showed enrichment of top-ranked biological process (BP) in LPS versus vehicle-treated group.

**S10.** GSEA analysis was applied using the hallmark genes from the MSigDB Database on the biological process of oxidative phosphorylation pathway in indicated treatment conditions.

**S11.** Gene expression levels of LDHA in BMDMs were determined in indicated treatment conditions.

**S12.** The amino acid sequence of conserved lysine 318 site in indicated species.

**S13.** Analysis of IL-6, TNF $\alpha$  mRNA expression levels by qPCR in BMDMs with indicated treatment conditions.

**S14.** The proportion of FITC-positive Kupffer cells in the liver was determined with flow cytometry.

**S15.** T cell activation markers CD25 and CD69 staining and gated from the total T cell population (n=3 animals/group).

**Table S1**

| <b>Chemicals, Reagents, Mediums</b>                               | <b>Source</b>      | <b>Identifier</b> |
|-------------------------------------------------------------------|--------------------|-------------------|
| Lipopolysaccharides from Escherichia coli O55:B5                  | Sigma-Aldrich      | Cat# L2880        |
| Lipopolysaccharides from Escherichia coli O111:B4                 | Sigma-Aldrich      | Cat# F3665        |
| Vorinostat (SAHA)                                                 | MedChemExpress     | Cat# HY-10221     |
| 2-Deoxy-D-glucose                                                 | MedChemExpress     | Cat# HY-13966     |
| Percoll                                                           | Merck              | Cat# P1644        |
| Collagenase Type IV                                               | Sigma-Aldrich      | Cat# C4-BIOC      |
| Nicotinamide (NAM)                                                | Sigma-Aldrich      | Cat# N3376        |
| DAPI Staining Solution                                            | Abcam              | Cat# AB228549     |
| VECTASHIELD Antifade Mounting Medium                              | VectorLaboratories | Cat# H-1000-10    |
| HyClone Phosphate Buffered Saline solution (DPBS)                 | Cytiva             | Cat# SH30256.FS   |
| Ethylenediaminetetraacetic acid                                   | Merck              | Cat# E9884        |
| HyClone Dulbecco's Modified Eagle Medium (DMEM) with high glucose | Cytiva             | Cat# SH30022.02   |
| Fetal Bovine Serum                                                | Gibco              | Cat#26140079      |
| Penicillin-Streptomycin Solution                                  | Gibco              | Cat# 15140130     |
| TRIzol™ Reagent                                                   | Invitrogen         | Cat# 15596026     |
| <b>Antibodies</b>                                                 |                    |                   |
| Rabbit anti-Mouse IgG                                             | Abcam              | Cat# AB7000       |
| Rabbit polyclonal anti-PYCARD Antibody                            | Invitrogen         | Cat# PA5-50915    |
| Rat monoclonal anti-TOMM20 Antibody                               | Abcam              | Cat# AB309083     |
| Mouse monoclonal anti-FLAG Antibody                               | Sigma-Aldrich      | Cat# F3165        |
| Rat Monoclonal anti-F4/80 Antibody                                | Biolegend          | Cat# 123107       |
| Rat Monoclonal anti-CD206 Antibody                                | Biolegend          | Cat# 141707       |
| Rat Monoclonal anti-CD25 Antibody                                 | Biolegend          | Cat# 102037       |
| Rat Monoclonal anti-CD45 Antibody                                 | Biolegend          | Cat# 157211       |
| Rat Monoclonal anti-CD86 Antibody                                 | Biolegend          | Cat# 159203       |
| Rat Monoclonal anti- Ly6G Antibody                                | Biolegend          | Cat# 127653       |
| Rat Monoclonal anti-Ly6C Antibody                                 | Cell Signaling     | Cat# 75092        |
| Rat Monoclonal anti-CD19 Antibody                                 | Invitrogen         | Cat# 17-0193-82   |

|                                                                                      |                  |                                                                        |
|--------------------------------------------------------------------------------------|------------------|------------------------------------------------------------------------|
| Rat Monoclonal anti-CD44 Antibody                                                    | Cell Signaling   | Cat# 75122                                                             |
| Armenian Hamster Monoclonal anti-CD11c Antibody                                      | Biolegend        | Cat# 117321                                                            |
| Armenian Hamster Monoclonal anti-TCR $\beta$ Antibody                                | Biolegend        | Cat# 117321                                                            |
| Armenian Hamster Monoclonal anti-CD69 Antibody                                       | Invitrogen       | Cat# 25-0691-82                                                        |
| Rat Monoclonal anti-CD11b Antibody                                                   | Cell Signaling   | Cat# 16538                                                             |
| Ghost Dye                                                                            | Cell Signaling   | Cat# 18452                                                             |
| Rabbit Polyclonal Anti-LDHA Antibody                                                 | Invitrogen       | Cat# PA5-27406                                                         |
| Anti-Rabbit HRP conjugated secondary antibody                                        | Santa Cruz       | Cat# SC-2004                                                           |
| Anti-Mouse HRP conjugated secondary antibody                                         | Santa Cruz       | Cat# SC-2005                                                           |
| <b>Experimental Models: Cell Lines and Animals</b>                                   |                  |                                                                        |
| Human HEK293T                                                                        | ATCC             | Cat# CRL-11268                                                         |
| Mouse L929                                                                           |                  | Cat# CCL-1                                                             |
| C57BL/6 mice                                                                         | GD Animal Center |                                                                        |
| <b>Software and Algorithms</b>                                                       |                  |                                                                        |
| SnapGene                                                                             |                  | <a href="http://www.snapgene.com/">www.snapgene.com/</a>               |
| AdobeIllustrator                                                                     |                  | <a href="http://www.adobe.com/">www.adobe.com/</a>                     |
| Gene Set Enrichment Analysis                                                         |                  | <a href="http://www.gsea-msigdb.org/">www.gsea-msigdb.org/</a>         |
| FlowJo                                                                               |                  | <a href="http://www.flowjo.com/">www.flowjo.com/</a>                   |
| R 3.6.1                                                                              |                  | <a href="http://www.r-project.org/">www.r-project.org/</a>             |
| GraphPad Prism                                                                       |                  | <a href="http://www.graphpad.com/">www.graphpad.com/</a>               |
| ImageScope                                                                           |                  | <a href="http://www.leicabiosystems.com/">www.leicabiosystems.com/</a> |
| BioRender                                                                            |                  | <a href="http://www.biorender.com/">www.biorender.com/</a>             |
| <b>Recombinant DNA and Oligonucleotides</b>                                          |                  |                                                                        |
| Plasmid: pCMV-Tag 2a                                                                 | Stratagene       | Cat# 6084-1                                                            |
| Plasmid: pBluescript                                                                 | Stratagene       | Cat# 6084-2                                                            |
| Plasmid: pGFP                                                                        | This study       |                                                                        |
| Plasmid: pCMV-Tag2a-LDHA                                                             | This study       |                                                                        |
| Plasmid: pCMV-Tag2a-LDHA-KQ57                                                        | This study       |                                                                        |
| Plasmid: pCMV-Tag2a-LDHA-KQ155                                                       | This study       |                                                                        |
| Plasmid: pCMV-Tag2a-LDHA-KQ232                                                       | This study       |                                                                        |
| Plasmid: pCMV-Tag2a-LDHA-KQ318                                                       | This study       |                                                                        |
| Plasmid: pCMV-Tag2a-LDHA-KR318                                                       | This study       |                                                                        |
| Mouse IL1b<br>Forward:AGTTGACGGACCCCAAAAG<br>Reverse:AGCTGGATGCTCTCATCAGG            | SANGONG          |                                                                        |
| Mouse IL6<br>Forward:CCAGGTAGCTATGGTACTCCA<br>Reverse:GCTACCAAACTGGCTATAATC          | SANGONG          |                                                                        |
| Mouse Tnf<br>Forward:CCCTCACACTCAGATCATCTT<br>Reverse:GCTACGACGTGGGCTACAG            | SANGONG          |                                                                        |
| Mouse Ifn- $\beta$ Forward:GCCTTTGCCATCCAAGAGATGC<br>Reverse:ACACTGTCTGCTGGTGGAGTTC  | SANGONG          |                                                                        |
| Mouse D-loop<br>Forward:AATCTACCATCCTCCGTGAAACC<br>Reverse:TCAGTTTAGCTACCCCAA GTTTAA | SANGONG          |                                                                        |
| Mouse 18S<br>Forward:TAGAGGGACAAGTGGCGTTC<br>Reverse:CGCTGAGCCAGTCAGTGT              | SANGONG          |                                                                        |
| Mouse Tert                                                                           | SANGONG          |                                                                        |

|                                   |         |
|-----------------------------------|---------|
| Forward:CTAGCTCATGTGTCAAGACCCTCTT |         |
| Reverse:GCCAGCACGTTTCTCTCGTT      |         |
| Mouse Cox                         | SANGONG |
| Forward:GCCCCAGATATAGCATTCCC      |         |
| Reverse:GTTCATCCTGTTCTGCTCC       |         |
| Mouse Non-Numt                    | SANGONG |
| Forward:CTAGAAACCCCGAAACCAAA      |         |
| Reverse:CCAGCTATCACCAAGCTCGT      |         |
| Mouse B2m                         | SANGONG |
| Forward:ATGGGAAGCCGAACATACTG      |         |
| Reverse:CAGTCTCAGTGGGGTGAAT       |         |
